# Supplementary material for: Effective Study: Development and Application of a Question‐Driven, Time‐Effective Cardiac Magnetic Resonance Scanning Protocol
Source: PubMed Central journal article supplement — J Am Heart Assoc. 2021 Dec 31;11(1):e022605. doi: 10.1161/JAHA.121.022605 (PMC9075206; doi:10.1161/jaha.121.022605), 2021-12-31
Supplement: JAH3-11-e022605-s001.pdf [file JAH3-11-e022605-s001.pdf]

# **SUPPLEMENTAL MATERIAL**

**Table S1. Advanced tissue characterization and additional cines performed on the basis of the clinical indication in the tailored CMR.**

| <b>Indication</b>        | <b>Fat module</b> | <b>Edema module</b> | <b>RV module</b> |
|--------------------------|-------------------|---------------------|------------------|
| (confirmed or suspected) |                   |                     |                  |
| DCM                      | +                 | +/-                 | +/-              |
| AC                       | +                 |                     | +                |
| HCM                      |                   | +                   |                  |
| Myocarditis              |                   | +                   |                  |
| MINOCA                   |                   | +                   |                  |
| Amyloidosis              |                   | +                   |                  |
| Athlete's Heart          | +                 |                     | +                |

**Table S2. Impact of CMR versus stress CMR, and excluding patients lost at follow-up.**

|                               | <b>Whole cohort</b> | <b>Standard CMR</b> | <b>Tailored CMR</b> |
|-------------------------------|---------------------|---------------------|---------------------|
| <b>Whole cohort</b>           |                     |                     |                     |
| Total (lost to FU)            | 220 (44)            | 137 (32)            | 83 (12)             |
| N                             | 176                 | 105                 | 71                  |
| New diagnosis <i>N (%)</i>    | 36 (20%)            | 21 (20%)            | 15 (21%)            |
| New unexpected diagnosis      | 2 (1%)              | 0                   | 2 (3%)              |
| Therapeutic consequences      |                     |                     |                     |
| • Change in medication        | 20 (11%)            | 16 (15%)            | 4 (6%)              |
| • Invasive procedure/surgery  | 32 (19%)            | 20 (19%)            | 12 (17%)            |
| • Ordering of new tests       | 10 (6%)             | 5 (4%)              | 5 (7%)              |
| • Avoided invasive procedure* | 3 (2%)              | 2 (2%)              | 1 (1%)              |
| CMR impact <i>N (%)</i>       | 100 (57%)           | 62 (59%)            | 38 (54%)            |
| <b>Stress CMR**</b>           |                     |                     |                     |
| Original cohort (lost to FU)  | 46 (11)             | 25 (8)              | 21 (3)              |
| N=                            | 35                  | 17                  | 18                  |
| New diagnosis                 | 8 (23%)             | 4 (24%)             | 4 (24%)             |
| New unexpected diagnosis      | 0                   | 0                   | 0                   |
| • Therapeutic consequences    |                     |                     |                     |
| • Change in medication        | 1 (3%)              | 1 (6%)              | 0                   |
| • Invasive procedure/surgery  | 8 (23%)             | 3 (18%)             | 5 (29%)             |

|                               |          |         |         |
|-------------------------------|----------|---------|---------|
| • Ordering of new tests       | 1 (3%)   | 1 (6%)  | 0       |
| • Avoided invasive procedure* | 3 (9%)   | 2 (12%) | 1 (6%)  |
| CMR impact <i>N</i> (%)       | 18 (51%) | 9 (53%) | 9 (50%) |

### CMR\*\*

|                               |          |          |          |
|-------------------------------|----------|----------|----------|
| Total (lost to FU)            | 144 (33) | 98 (24)  | 46 (9)   |
| <i>N</i>                      | 111      | 74       | 37       |
| New diagnosis                 | 28 (25%) | 16 (22%) | 12 (32%) |
| New unexpected diagnosis      | 1 (1%)   | 0        | 1 (3%)   |
| Therapeutic consequences      |          |          |          |
| • Change in medication        | 19 (17%) | 15 (20%) | 4 (11%)  |
| • Invasive procedure/surgery  | 19 (17%) | 13 (18%) | 6 (16%)  |
| • Ordering of new tests       | 2 (2%)   | 0        | 2 (12%)  |
| • Avoided invasive procedure* | 0        | 0        | 0        |
| CMR impact <i>N</i> (%)       | 69 (62%) | 44 (59%) | 25 (68%) |

\*: “avoided invasive procedures” are not considered to calculate CMR/stress-CMR impact. \*\*: excluding research scans. *CMR*: Cardiac Magnetic Resonance; *FU*: follow-up.

**Table S3. Confidence degree in diagnosis in the control group.**

|                                    | <b>Standard protocol</b> | <b>Simulated rapid protocol</b> | <b>Simulated tailored protocol</b> | <b>P value</b>             |
|------------------------------------|--------------------------|---------------------------------|------------------------------------|----------------------------|
| <b>N</b>                           | 137                      | 137                             | 137                                |                            |
| <b>Confidence in the diagnosis</b> |                          |                                 |                                    |                            |
| <b>Poor</b>                        | 3                        | 6                               | 4                                  |                            |
| <b>Moderate</b>                    | 15                       | 53                              | 24                                 |                            |
| <b>Strong</b>                      | 118                      | 77                              | 108                                |                            |
|                                    |                          |                                 |                                    | Standard vs rapid: <.001   |
|                                    |                          |                                 |                                    | Tailored vs rapid: <.001   |
|                                    |                          |                                 |                                    | Standard vs tailored: 0.17 |

The 137 scans constituting the control group were anonymized and exported three times: 1) with all the sequences originally acquired (“standard protocol”); 2) excluding all advanced tissue characterization images and RV cines, according to the rapid scanning approach (“simulated rapid protocol”); 3) including a set of sequence according to the tailored CMR approach (“simulated tailored protocol”). Then, two CMR-experienced cardiologists (VV and SF) reported independently half the scans each. Each time they were made aware of the referral question and asked to make a diagnosis and express a degree of confidence in it (expressed as “poor”, “moderate”, “strong”). Confidence degree in the diagnosis in each group are reported in the table. Wilcoxon Signed-Rank Test was used to test the differences in diagnosis confidence among the groups. Bonferroni correction was applied to counteract the problem of multiple comparisons. The confidence degree was higher in the standard protocol compared to the rapid CMR, but was unchanged between the tailored and the standard CMR.

**Figure S1. Scan protocolling and acquisition flowchart.**

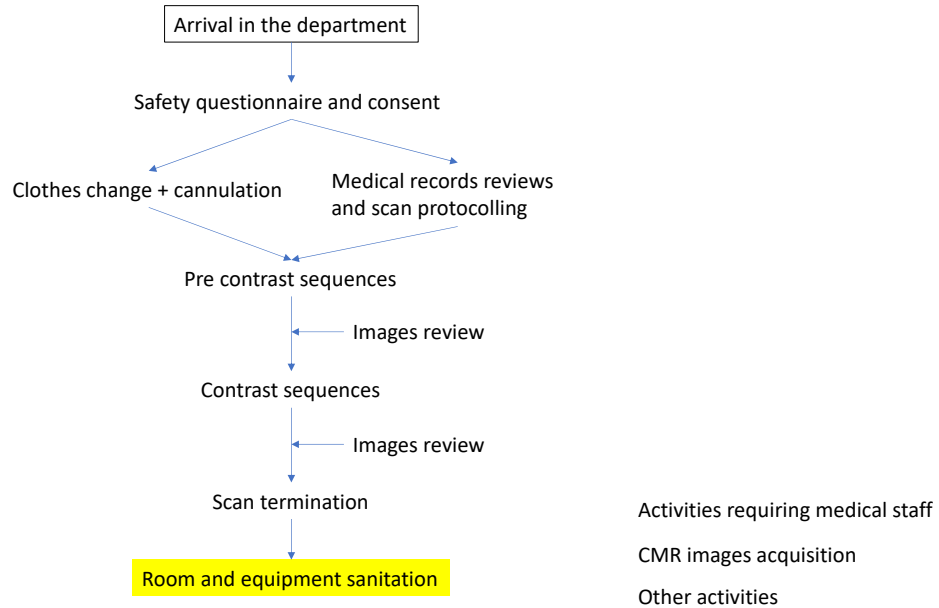

Medical records review and CMR protocolling is performed immediately before the scan. Images are reviewed by a CMR doctor before contrast administration and before ending the scan. Tailored CMR protocolling did not increase the staff needed nor the permanence in the department.
